# Supplementary material for: Long lifetimes white afterglow in slightly crosslinked polymer systems
Source: PubMed Central journal article supplement (PMC10997626; doi:10.1038/s41467-024-47378-2), 2024-04-05
Supplement: 41467_2024_47378_MOESM3_ESM.pdf [file 41467_2024_47378_MOESM3_ESM.pdf]

## **DESCRIPTION OF ADDITIONAL SUPPLEMENTARY FILES**

**Supplementary Movie 1:** Yellow phosphorescence of PAACR film under 365 nm UV excitation at room temperature. The power of excitation source is 30W.

**Supplementary Movie 2:** Long-lived room temperature phosphorescence video of PAACR film under visible light excitation. The power of excitation source is 10W.

**Supplementary Movie 3:** Blue phosphorescence of PAPHE film under 365 nm UV excitation at room temperature. The power of excitation source is 30W.

**Supplementary Movie 4:** Green phosphorescence of PAABM film under 365 nm UV excitation at room temperature. The power of excitation source is 30W.

**Supplementary Movie 5:** Red phosphorescence of PAPY film under 365 nm UV excitation at room temperature. The power of excitation source is 30W.

**Supplementary Movie 6:** The blue green and green phosphorescence of PAABM films excited by 254 nm and 365 nm ultraviolet light at room temperature. The excitation source power is 5W.

**Supplementary Movie 7:** White room temperature phosphorescence of three component polymer white emitter TPAP514 under 365 nm UV excitation. Irradiation about 6 s.
